# Supplementary material for: Magneto-mechanical destruction of cancer-associated fibroblasts using ultra-small iron oxide nanoparticles and low frequency rotating magnetic fields
Source: Royal Society of Chemistry journal article supplement (doi:10.1039/d1na00474c), 2021-11-18
Supplement: d1na00474c1.pdf [file d1na00474c1.pdf]

### Legends to supplementary figures

**Figure S1:** The average number of molecules of PO-PEG-COOH per nanocrystal was measured by Fourier Transform Infrared Spectroscopy. Infrared spectra in KBr pellets of various proportions of PO-PEG-COOH mixed with a constant amount of USPIONs were recorded. The normalized 1110  $\text{cm}^{-1}$  band was used for the establishment of the calibration curve and the average number of PO-PEG-COOH per nanoparticle was deduced from this curve and evaluated to  $176 \pm 16$ .

**Figure S2:** Calibration curve using gastrin peptide by OPA assay.

**Figure S3:** a) CCK2R expression in CAF cell lines. Two immortalized human cancer-associated fibroblasts (CAF) cell lines, CAF1 and CAF2, were permanently transfected with an expression vector encoding the human CCK2R. 2 clones expressing the CCK2R were selected and termed respectively CAF1-CCK2 and CAF2-CCK2. Cells were incubated with 10 nM DY647-CCK9 agonist in presence or in absence of 10  $\mu\text{M}$  GV 150013X, a specific CCK2R antagonist. Cell-associated fluorescence was determined by flow cytometry, revealing the expression of CCK2R on CAF cell lines. b) USPION@Gastrin uptake depends on CCK2R expression. Cells were incubated with increased concentrations of USPION@Gastrin in presence or in absence of 10  $\mu\text{M}$  Gastrin-17, a specific CCK2R agonist, for 24 h. Cell-associated fluorescence was measured by flow cytometry. Results are expressed as fluorescence associated with the cells and are the mean  $\pm$  SEM of at least three separate experiments.

**Figure S4:** Analysis of CAFs death upon 40 mT RMF exposure. CAF1-CCK2 cells were incubated for 24 h with increased concentration of USPIO@Gastrin (4, 8 and 16  $\mu\text{g}$  magnetic Fe / ml), washed and exposed to RMF for 2 h. Different frequencies (0.2, 1, 10, 20 Hz) were assayed. Dead cells were labeled with AnnV/PI, 4h after RMF exposure, and counted by flow cytometry. Results are expressed as mean  $\pm$  SEM of at least three separate experiments. Statistical analysis was performed using two-way ANOVA test.

**Figure S5:** Analysis of CAFs death upon 20 mT RMF exposure. CAF1-CCK2 cells were incubated for 24 h with increased concentration of USPIO@Gastrin (4, 8 and 16  $\mu\text{g}$  magnetic Fe / ml), washed and exposed to RMF for 2 h. Different frequencies (1, 10, 20 Hz) were assayed. Dead cells were labeled with AnnV/PI, 4h after RMF exposure, and counted by flow cytometry. Results are expressed as mean  $\pm$  SEM of at least three separate experiments. Statistical analysis was performed using two-way ANOVA test.

**Figure S6:** Analysis of CAFs death upon 60 mT / 1 Hz RMF exposure. CAF1-CCK2 cells were incubated for 24 h with increased concentration of USPIO@Gastrin (4, 8 and 16  $\mu\text{g}$  magnetic Fe / ml), washed and exposed to RMF for 2 h. Dead cells were labeled with AnnV/PI, 4h after RMF exposure, and counted by flow cytometry. Results are expressed as mean  $\pm$  SEM of at least three separate experiments. Statistical analysis was performed using two-way ANOVA test.

**Figure S7:** Analysis of CAFs death upon 200 mT RMF exposure. CAF1-CCK2 cells were incubated for 24 h with increased concentration of USPIO@Gastrin (4, 8 and 16  $\mu\text{g}$  magnetic Fe

/ ml), washed and exposed to RMF for 2 h. Different frequencies (1, 10, 20 Hz) were assayed. Dead cells were labeled with AnnV/PI, 4h after RMF exposure, and counted by flow cytometry. Results are expressed as mean  $\pm$  SEM of at least three separate experiments. Statistical analysis was performed using two-way ANOVA test.

**Figure S8:** Analysis of CAFs death upon 380 mT RMF exposure. CAF1-CCK2 cells were incubated for 24 h with increased concentration of USPIO@Gastrin (4, 8 and 16  $\mu$ g magnetic Fe / ml), washed and exposed to RMF for 2 h. Different frequencies (1, 10, 20 Hz) were assayed. Dead cells were labeled with AnnV/PI, 4h after RMF exposure, and counted by flow cytometry. Results are expressed as mean  $\pm$  SEM of at least three separate experiments. Statistical analysis was performed using two-way ANOVA test.

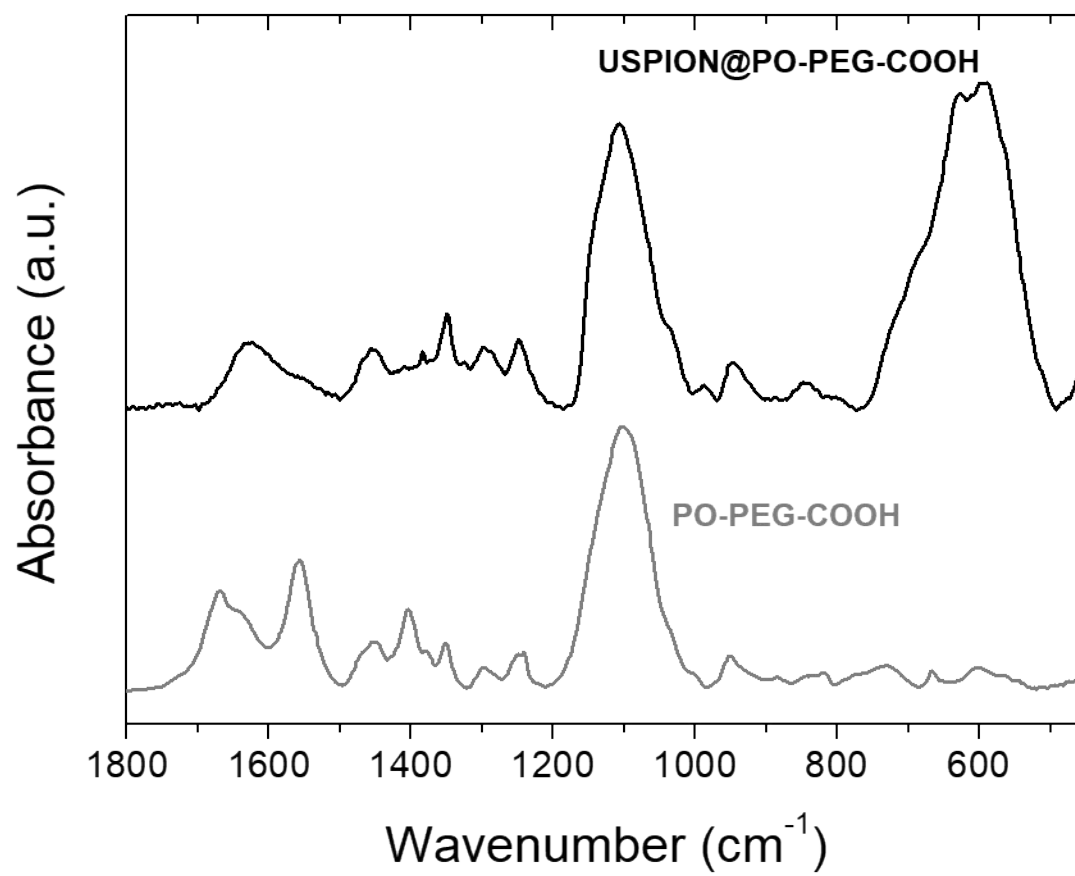

**Figure S1**

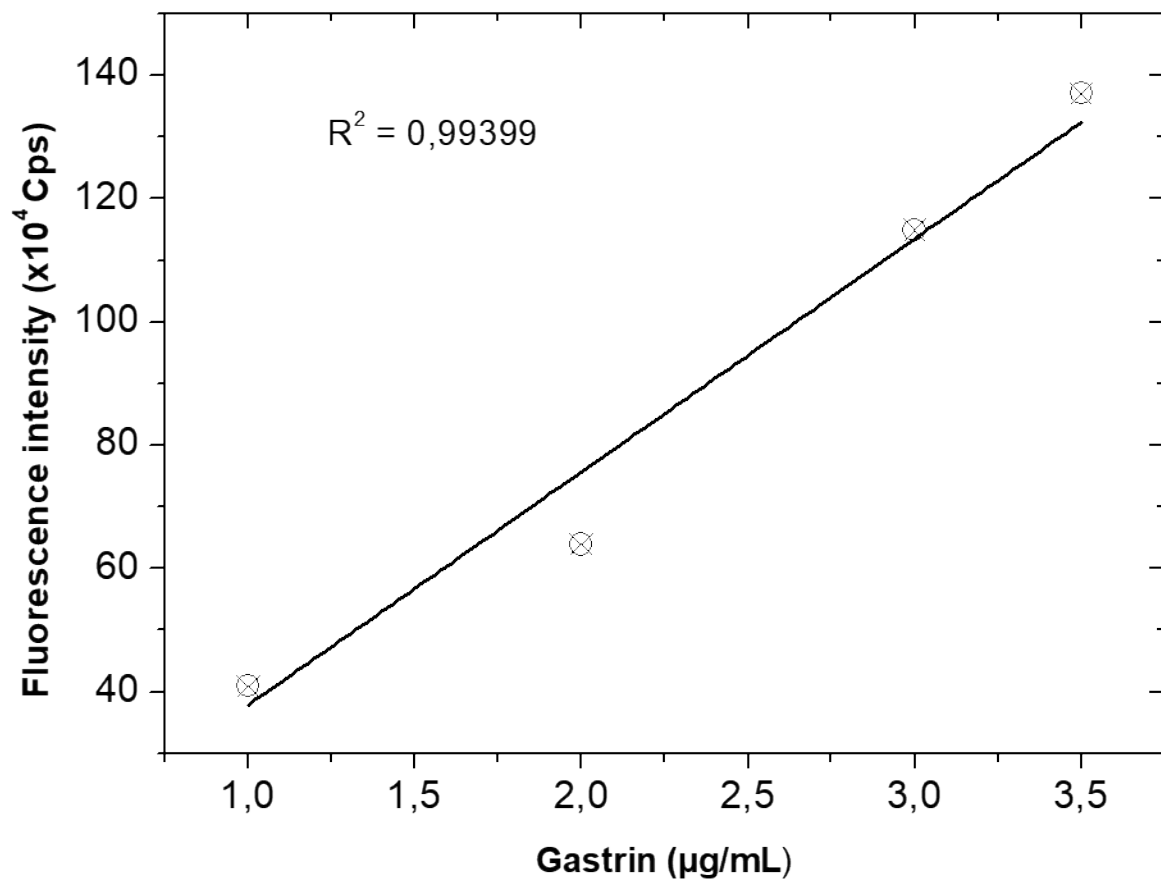

**Figure S2**

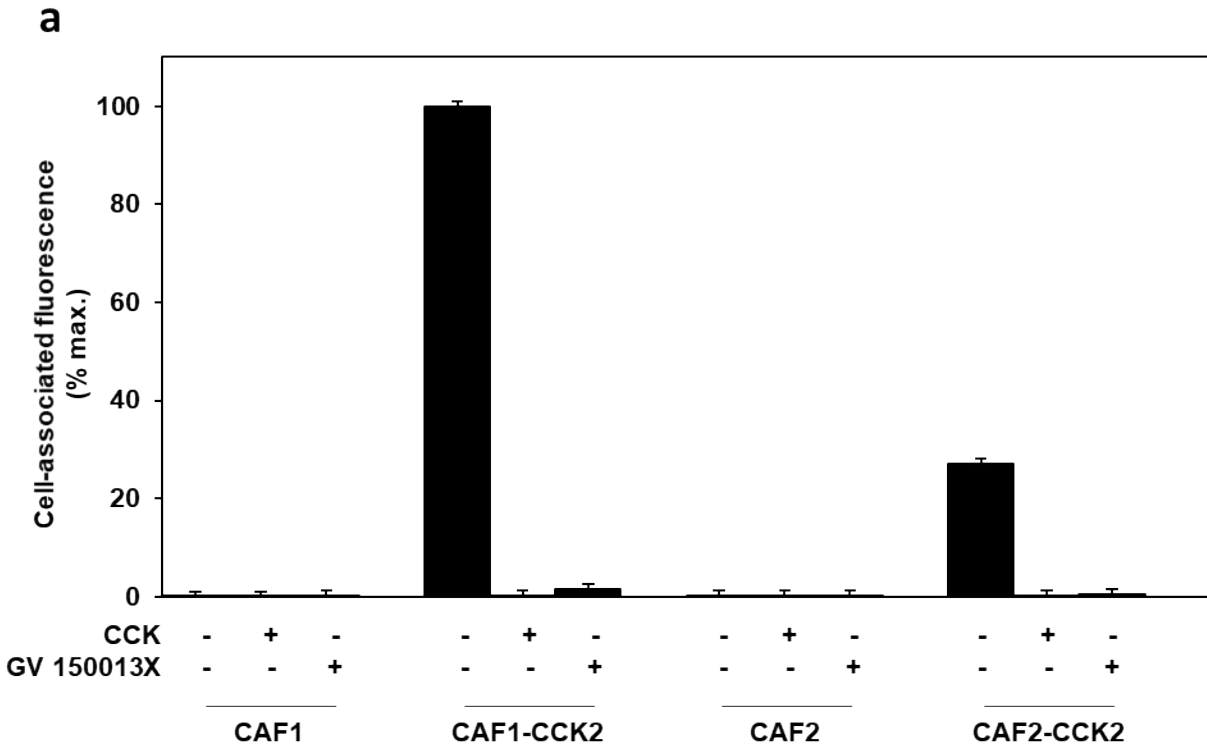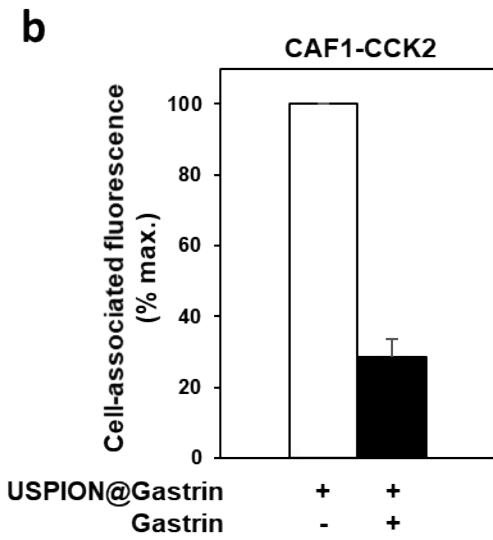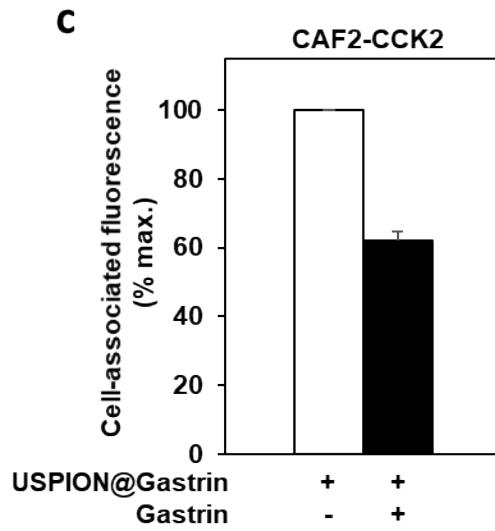

Figure S3

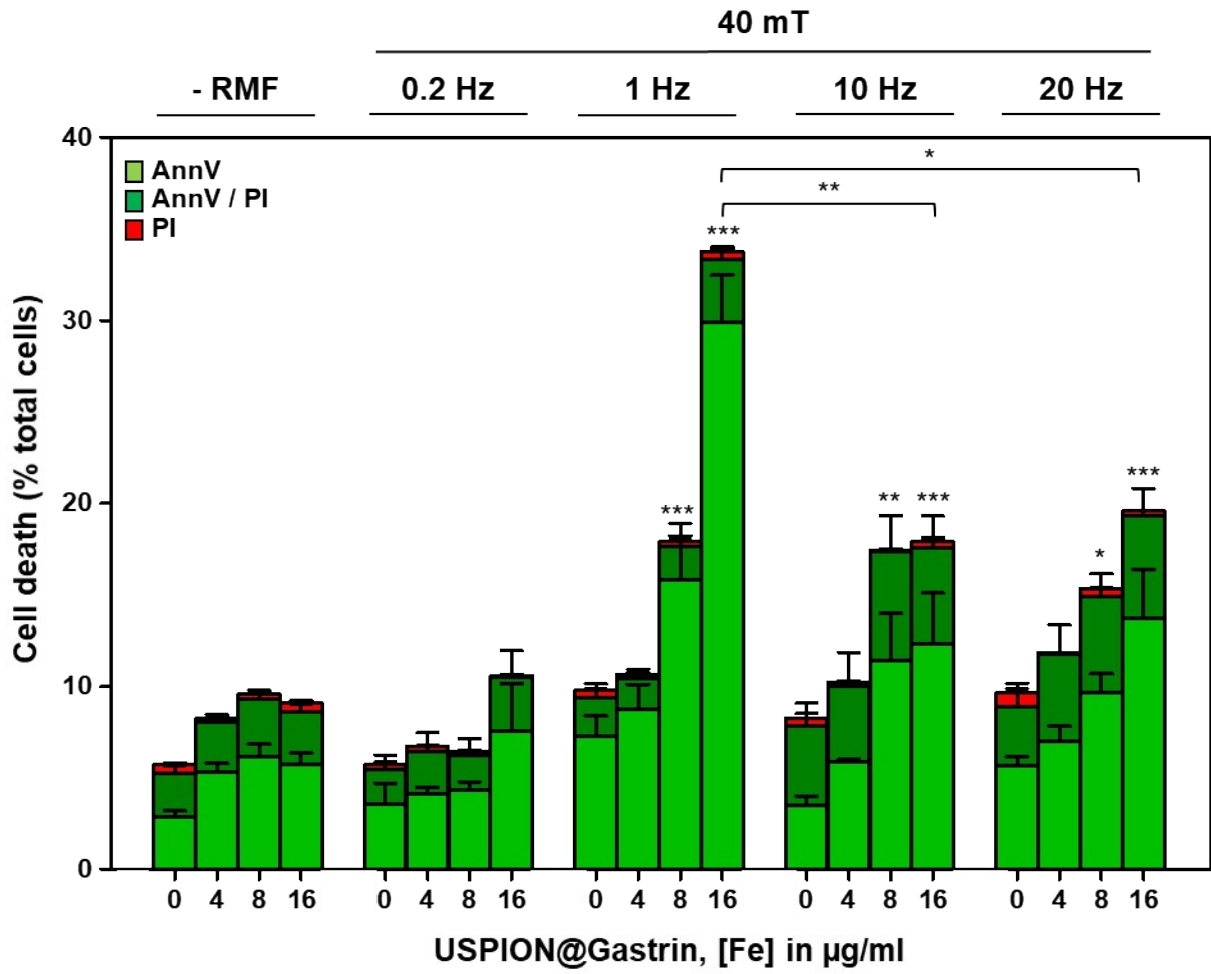

Figure S4

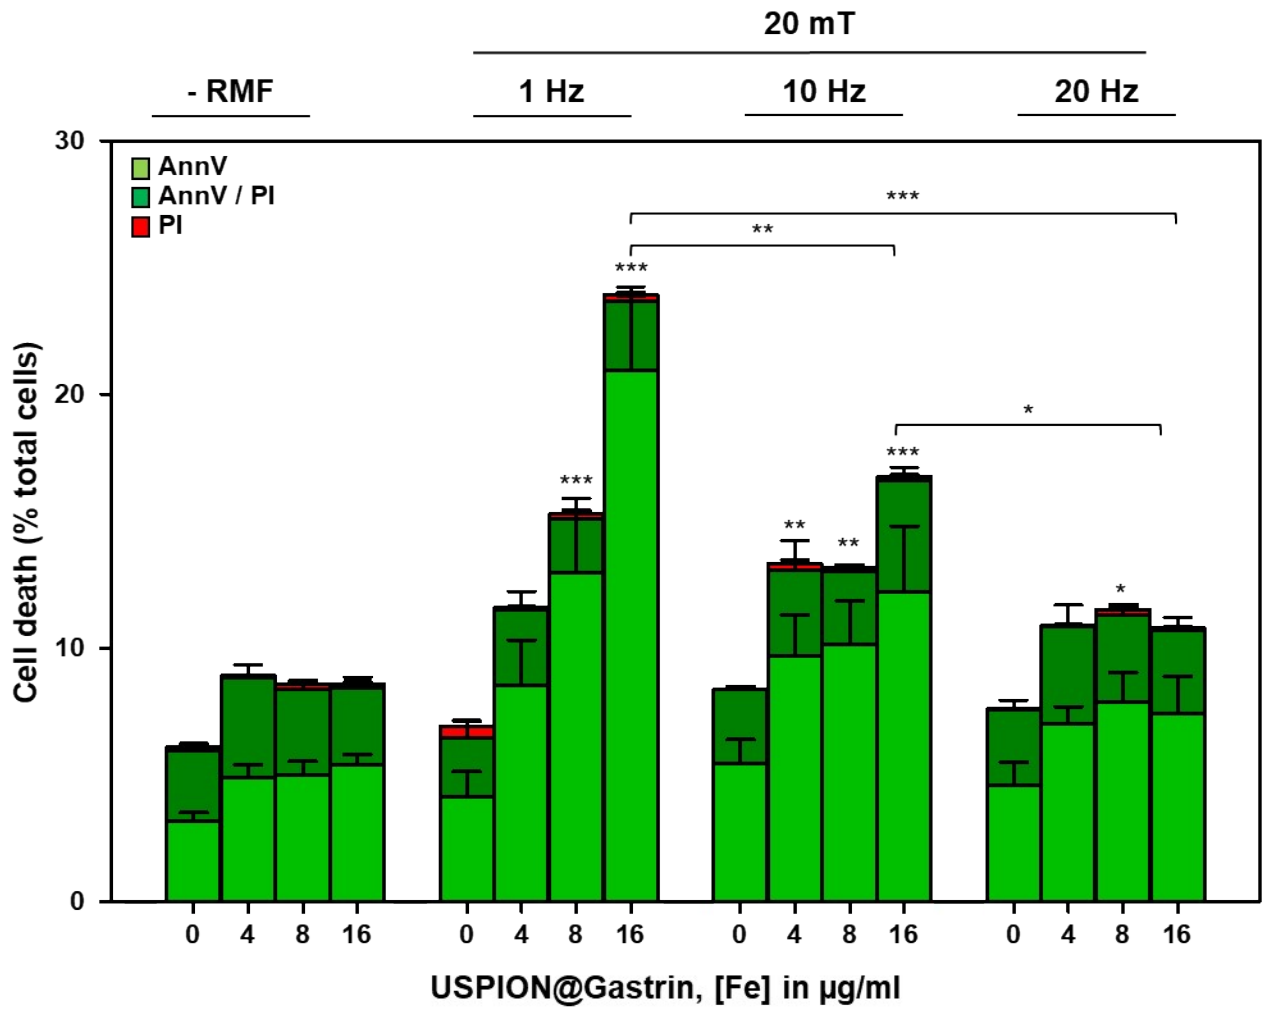

Figure S5



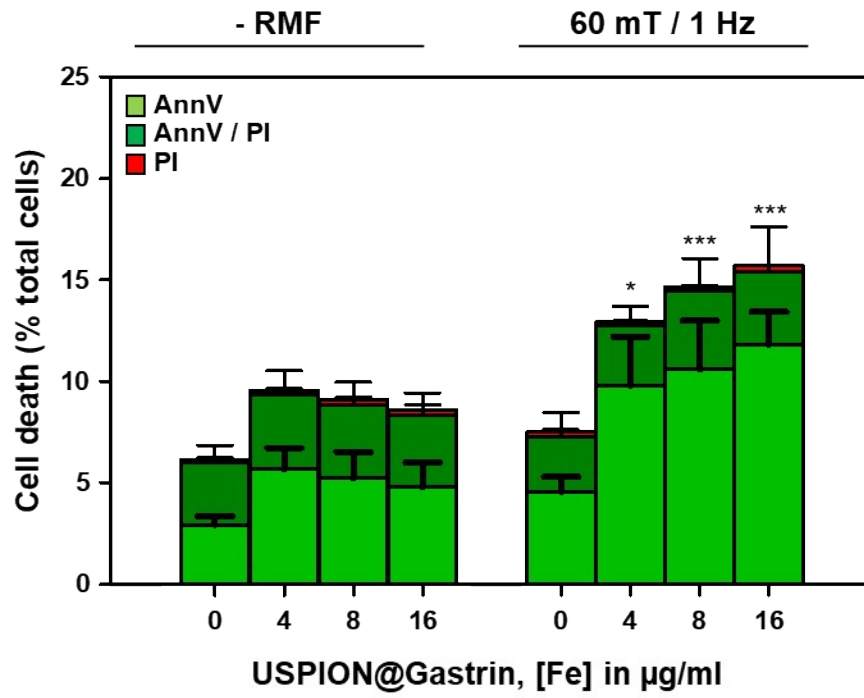

Figure S6

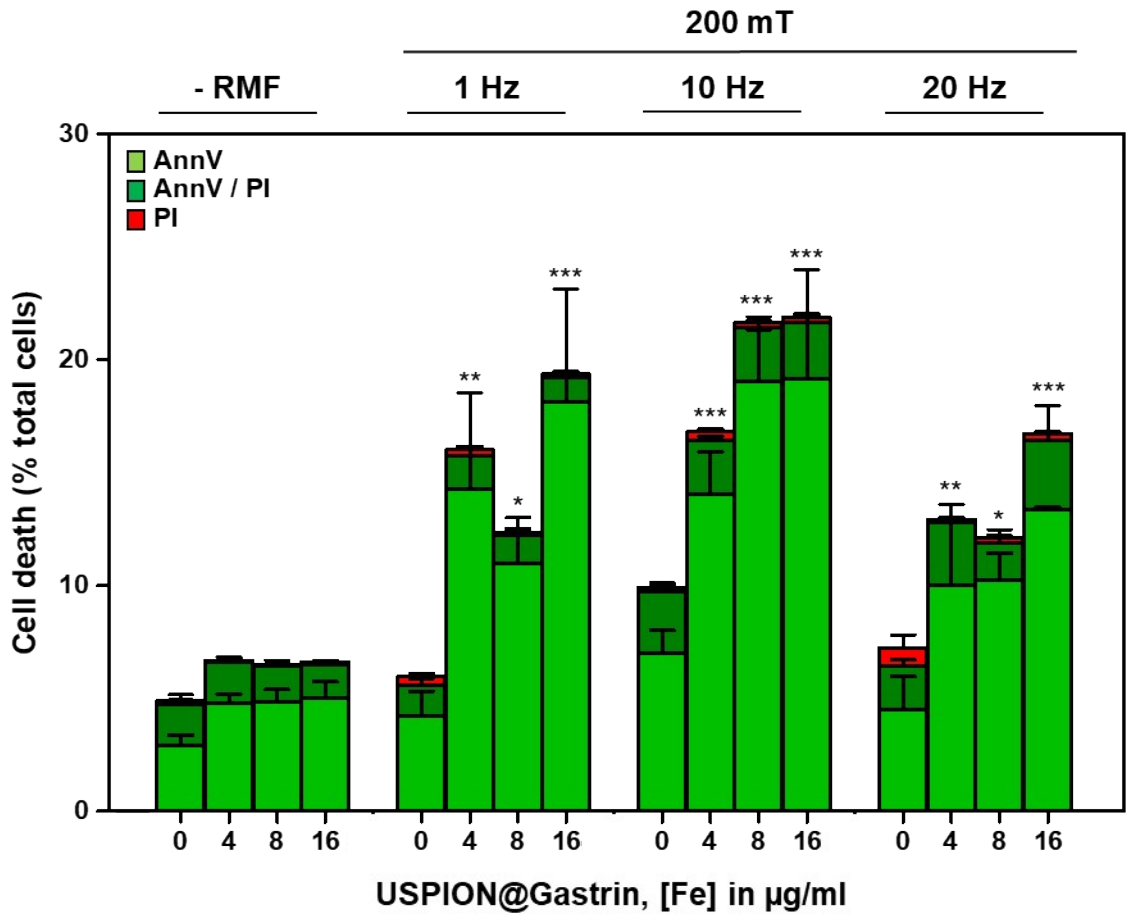

Figure S7

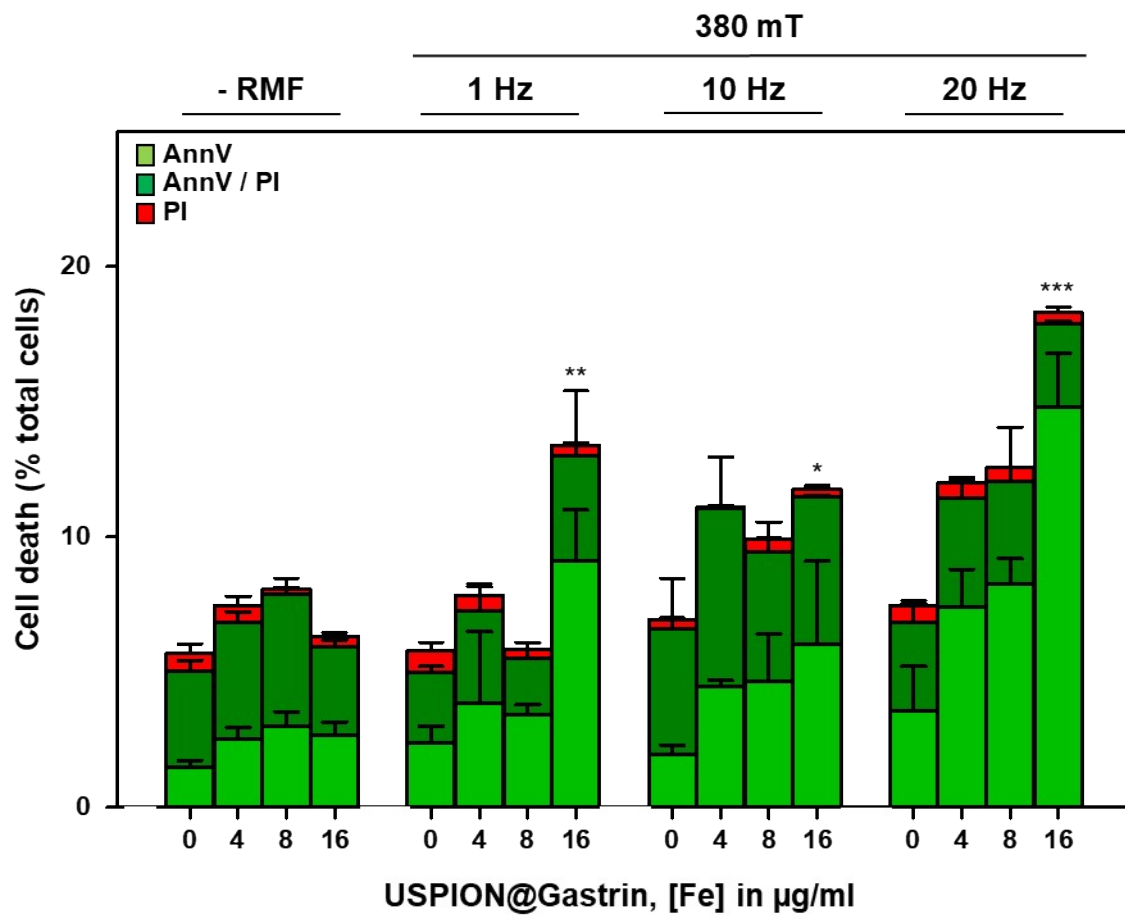

Figure S8
